# Supplementary material for: Pathophysiologic and Prognostic Implications of Right Atrial Hypertension in Adults With Tetralogy of Fallot
Source: PubMed Central journal article supplement — J Am Heart Assoc. 2019 Nov 8;8(22):e014148. doi: 10.1161/JAHA.119.014148 (PMC6915294; doi:10.1161/jaha.119.014148), 2019-11-08

# **SUPPLEMENTAL MATERIAL**

**Table S1. Echocardiographic Indices of Right Ventricular Diastolic Function.**

| <b>Indices</b>          | <b>N</b> | <b>value</b> |
|-------------------------|----------|--------------|
| Tricuspid E, cm/s       | 103      | 58±19        |
| Tricuspid A, cm/s       | 82       | 37±13        |
| Tricuspid DT, ms        | 94       | 151±44       |
| Tricuspid E/A           | 82       | 1.6±0.6      |
| Tricuspid e', cm/s      | 114      | 9±5          |
| Tricuspid E/e'          | 96       | 6±3          |
| IVC size/collapsibility | 129      | ---          |

N: Number of patients with variable assessed

IVC: Inferior vena cava; E: tricuspid inflow early velocity; A: tricuspid inflow late or atrial velocity; e': tricuspid annular tissue Doppler early velocity; DT: Deceleration time

**Table S2. Echocardiographic Predictors of RAP >10 mmHg.**

|                               | <b>AUC</b> | <b>p</b> |
|-------------------------------|------------|----------|
| Tricuspid E, cm/s             | 0.516      | 0.611    |
| Tricuspid A, cm/s             | 0.505      | 0.684    |
| Tricuspid E/A                 | 0.521      | 0.480    |
| Tricuspid DT                  | 0.529      | 0.285    |
| Tricuspid e', cm/s            | 0.579      | 0.102    |
| Tricuspid E/e'                | 0.624      | 0.014    |
| Dilated IVC                   | 0.766      | <0.001   |
| Dilated IVC +reduced collapse | 0.742      | <0.001   |

RAP: Right atrial pressure; AUC: Area under the curve

Figure S1. Kaplan Meier curves comparing event-free survival based on inferior vena cava size and collapsibility (IVC hemodynamics).

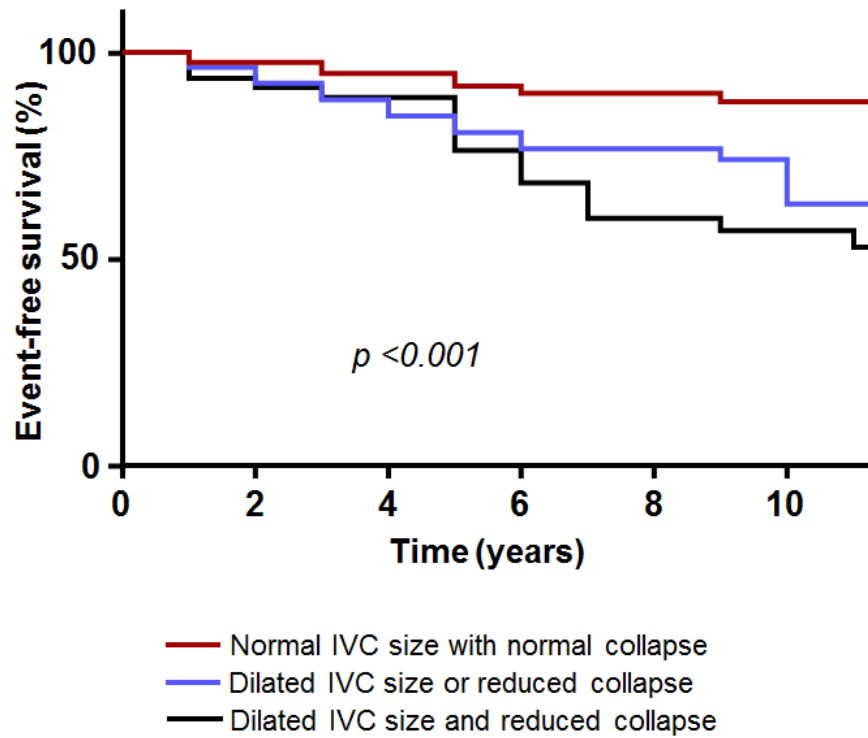

Supplement: JAH3-8-e014148-s001.pdf [file JAH3-8-e014148-s001.pdf]
